# Supplementary material
Source: PubMed Central journal article supplement (PMC1914112)
Supplement: plntphys_pp.107.099820_2.pdf [file plntphys_pp.107.099820_2.pdf]

## SUPPLEMENTAL FIGURE LEGEND

**Figure S1.**  $^1\text{H}$ -NMR spectrum of a crude extract from shoots of three-month-old seedlings of *L. latifolium*. Seedlings were grown under control conditions as described in materials and methods section. Spectra of crude extracts from shoots of seedlings grown under salt conditions were qualitatively similar.  $\beta$ -AB,  $\beta$ -alanine betaine; COS, choline-O-sulfate; Cho, choline; Inos, inositols; t-but, *tert*-butanol. Forty mg of dry powder were incubated in 1.5 mL ethanol 96% at 80°C until complete evaporation of ethanol and residues resuspended with 1.5 mL  $\text{D}_2\text{O}$  (99% deuterium) containing 0.5 mM t-but as an internal standard. t-but was used as a reference both for chemical shift (1.2000 ppm) and quantification of the signals.  $^1\text{H}$ -NMR spectrum was recorded on a Bruker NMR spectrometer operating at  $^1\text{H}$  frequency of 300 MHz. Values on the NMR signal are chemical shifts of the 9 protons of either the  $-\text{N}^+(\text{CH}_3)_3$  groups of COS, Cho and  $\beta$ -AB or those of the  $-\text{C}(\text{CH}_3)_3$  group of t-but. Other signals were attributed to substances indicated according to typical  $\delta$  (ppm) obtained with corresponding commercial products. Readers should pay attention to the fact that peak intensities on NMR spectrum were not directly related to the concentration of the various solutes detected.
