# Supplementary material
Source: PubMed Central journal article supplement (PMC1914112)

Gagneul et al., Fig. S1

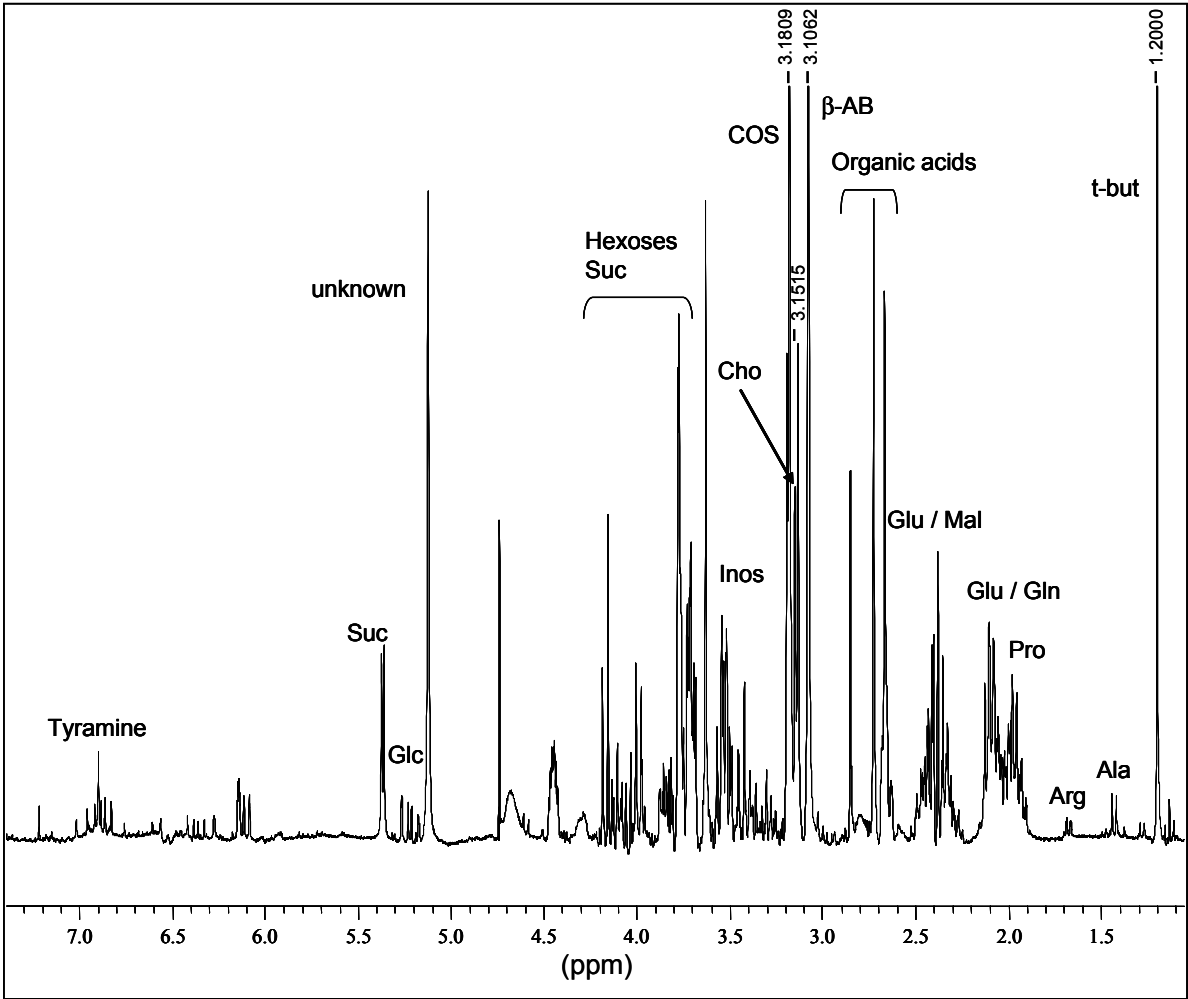

Supplement: plntphys_pp.107.099820_1.pdf [file plntphys_pp.107.099820_1.pdf]
